# Supplementary material for: Dynamic root growth in response to depth-varying soil moisture availability: a rhizobox study
Source: Copernicus journal article supplement (doi:10.5194/hess-27-2341-2023), 2023-06-29
Supplement: Supplementary file 1 [file hess-27-2341-2023-supplement.pdf]

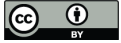

*Supplement of*

## **Dynamic root growth in response to depth-varying soil moisture availability: a rhizobox study**

**Cynthia Maan et al.**

*Correspondence to:* Cynthia Maan (c.maan@uva.nl)

The copyright of individual parts of the supplement might differ from the article licence.

An additional experiment with more qualitative results only.  
Root development in rather dry soil which get moistened more intensely after 33 days.

Figure S1

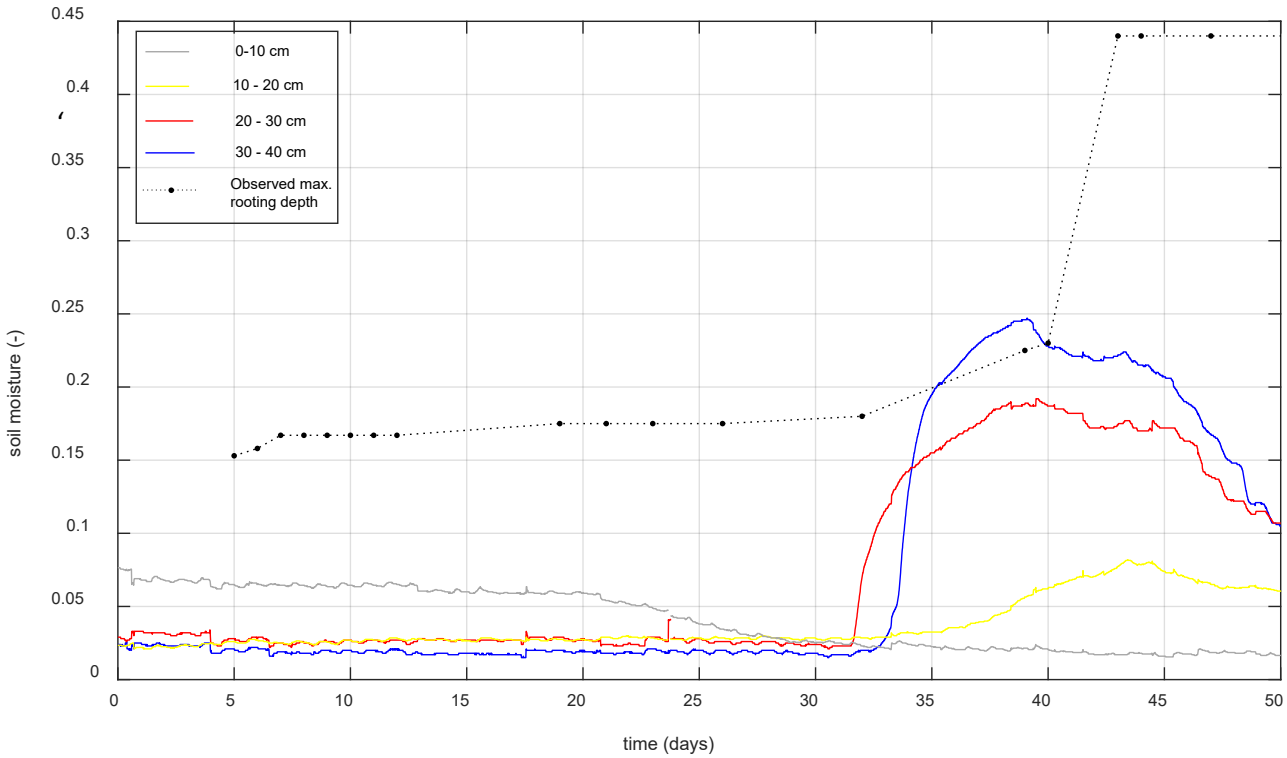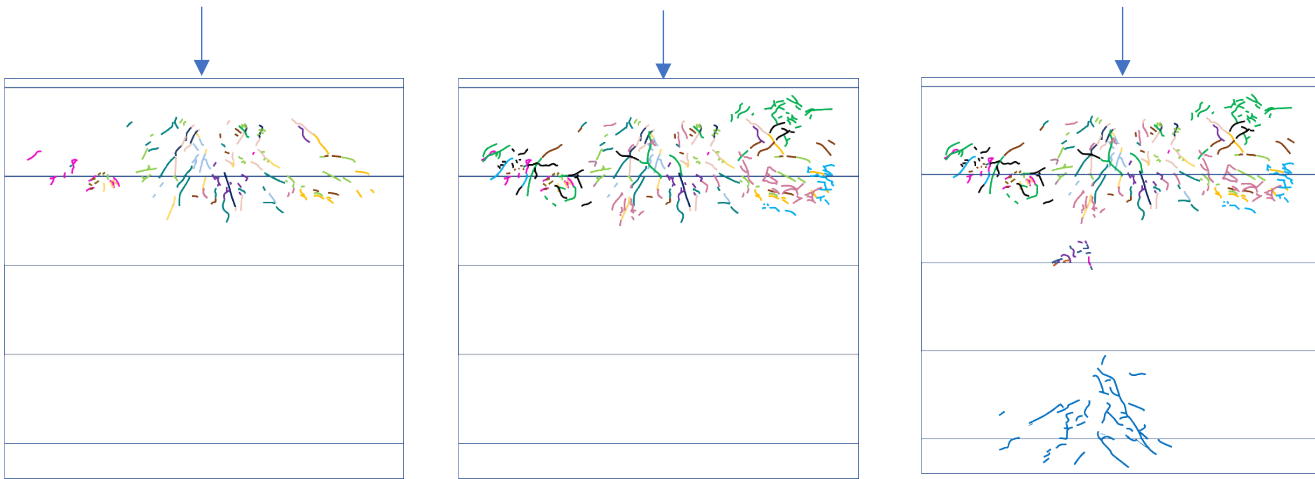

Developments of roots and soil moisture in a previous experiment in fairly dry soil and then after 33 days in more moistened soil.

A similar evolution was observed on the backside of the same rhizobox, where the maximum rooting depth remained relatively constant between day 6 and day 33, and increased rapidly to 40 cm depth in the subsequent 12 days (see figure 2). Different colors refer to different days on which roots were observed.

Figure S2

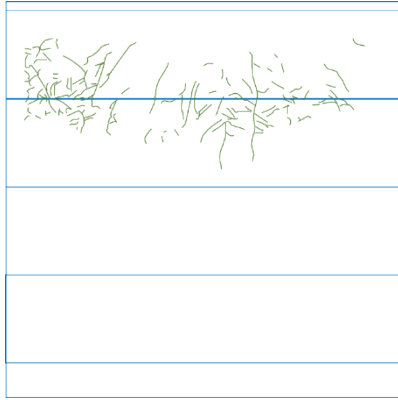

Day 33

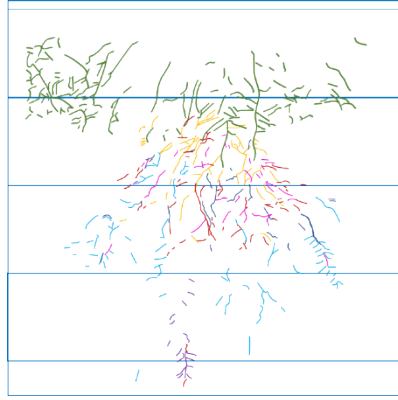

Day 45
